# Supplementary figures and images for: The homotropenylium cation: a system with a pinched π ring current
Source: Royal Society of Chemistry journal article supplement (doi:10.1039/c4cp01075b), 2014-01-01

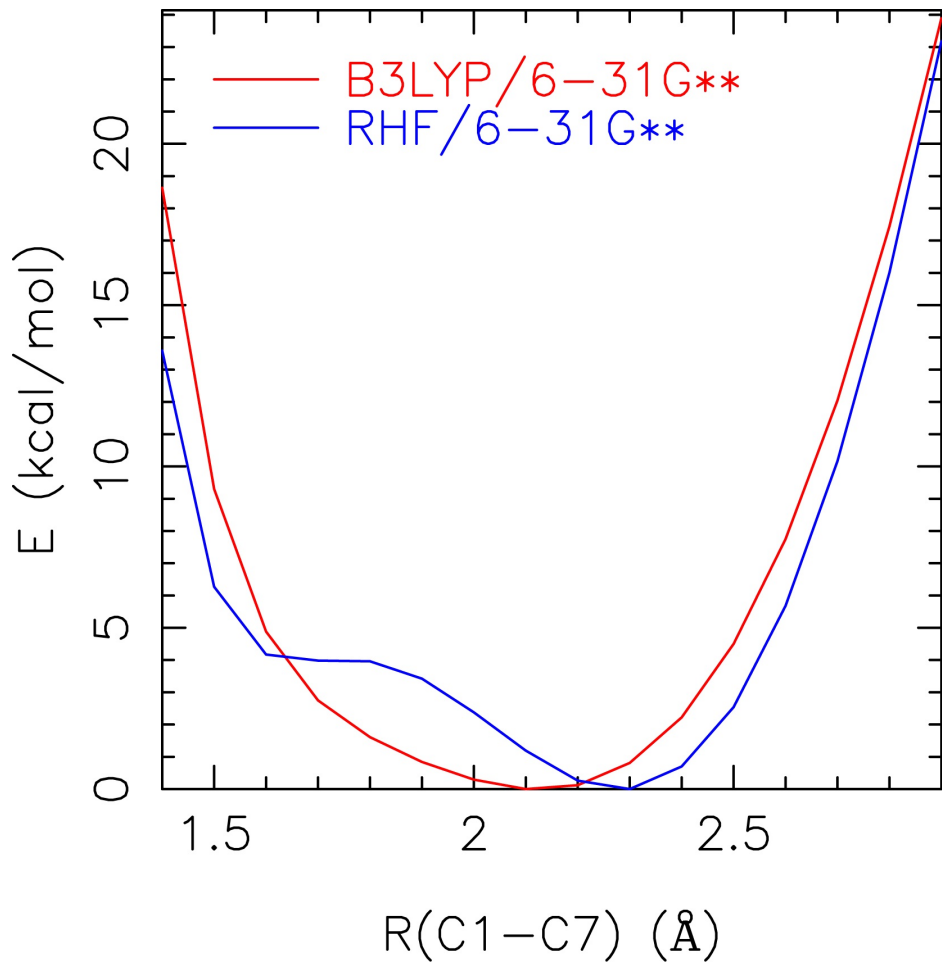

Supplement: c4cp01075b1.pdf [file c4cp01075b1.pdf]

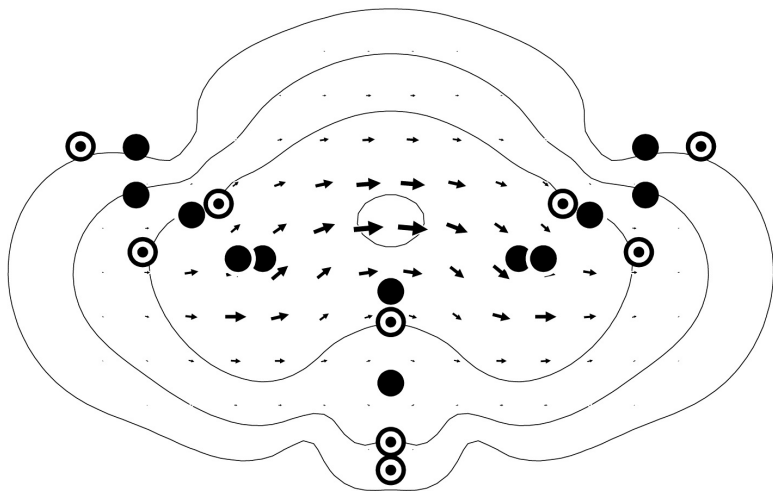

Supplement: c4cp01075b2.pdf [file c4cp01075b2.pdf]
